# Supplementary material
Source: Springer Nature journal article supplement (https://www.springermedizin.de/resource/supplementary/12933_2014_841_MOESM10_ESM.pdf/9539368)

Mean (umol/L)  $\pm$  95% CI

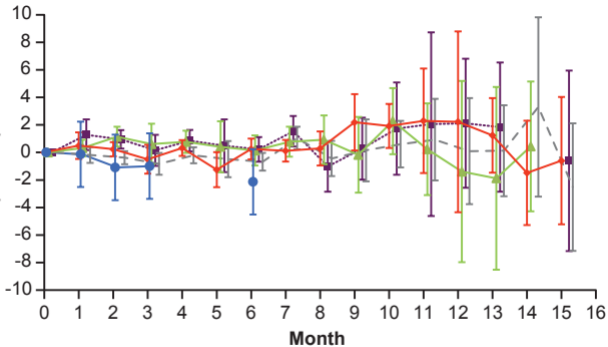

—●— Low —◆— Intermediate —▲— Medium —■— High — — — Placebo

Supplement: MOESM10 [file 9539368]
